# Supplementary material
Source: PubMed Central journal article supplement (PMC2722835)
Supplement: NIHMS111042-supplement-1_si_001.pdf [file NIHMS111042-supplement-1_si_001.pdf]

## Chemoselective Tryptophan Labeling with Rhodium Carbenoids at Mild pH

John M. Antos,<sup>†</sup> Jesse M. McFarland,<sup>†</sup> Anthony T. Iavarone<sup>‡</sup> and Matthew B. Francis<sup>†\*</sup>

<sup>†</sup>*Department of Chemistry, University of California, Berkeley, CA 94720-1460, and Materials Sciences Division, Lawrence Berkeley National Labs, Berkeley, CA 94720-1460, and* <sup>‡</sup>*QB3/Chemistry Mass Spectrometry Facility, University of California, Berkeley, CA 94720-3220*

francis@cchem.berkeley.edu

### Supporting Information

#### Procedures

**Modification of 3-Methylindole.** In a 0.6 mL microcentrifuge tube was combined 1.0  $\mu\text{L}$  of a *t*BuOH solution of 3-methylindole (200 mM, 0.20  $\mu\text{mol}$ ), 4.0  $\mu\text{L}$  of a *t*BuOH solution of **1** (1.0 M, 4.0  $\mu\text{mol}$ ), 5.0  $\mu\text{L}$  of an aqueous solution of  $\text{Rh}_2(\text{OAc})_4$  (4.0 mM, 20 nmol), 150  $\mu\text{L}$  of an aqueous solution of *t*BuNHOH (pH 6.0, 100 mM, 15  $\mu\text{mol}$ ), and 40  $\mu\text{L}$  of ddH<sub>2</sub>O. The reaction mixture was mixed gently at room temperature for 18 h, then diluted with 200  $\mu\text{L}$  of MeCN and analyzed by ESI-MS.

**Determination of pK<sub>a</sub> for H<sub>2</sub>NOH and *t*BuNHOH.** Solutions of H<sub>2</sub>NOH•HCl or *t*BuNHOH•HCl (~100 mM) were prepared in ddH<sub>2</sub>O. These solutions were then titrated with known volumes of 1.0 M NaOH and the resulting pH was measured using an accumet<sup>®</sup> Basic AB15 pH meter (Fisher Scientific, USA). The pH was then plotted as a function of the volume of 1.0 M NaOH added, and the resulting titration curves were used to estimate the pK<sub>a</sub>.

#### **pH Profiles for Catalytic Degradation of Diazo Compound **1** with *t*BuNHOH and H<sub>2</sub>NOH.**

Buffered solutions containing 100 mM H<sub>2</sub>NOH•HCl or 100 mM *t*BuNHOH•HCl were prepared and adjusted to the pH values depicted in Figure S4. To a 0.6 mL microcentrifuge tube was then added 150  $\mu\text{L}$  of the appropriate buffer, 5.0  $\mu\text{L}$  of an aqueous solution of  $\text{Rh}_2(\text{OAc})_4$  (1.8 mg/mL, 20 nmol), 5.0  $\mu\text{L}$  of a 400 mM *t*BuOH solution of **1** (134 mg/mL, 2.0  $\mu\text{mol}$ ), and 40.0  $\mu\text{L}$  of ddH<sub>2</sub>O. The reactions were then incubated on a laboratory vortexer for 10 h at room temperature and then diluted with 150  $\mu\text{L}$  of MeCN. The diluted samples were then analyzed by reversed-phase HPLC (monitoring at 280 nm). The extent of diazo compound degradation was determined by comparing the observed peak area for **1** to standard samples of **1** that had been incubated for an identical period of time in pH 3.0 buffer in the absence of  $\text{Rh}_2(\text{OAc})_4$ .

**MS/MS Sequencing of Modified Melittin.** ~20.0  $\mu\text{L}$  of a crude melittin reaction mixture (modified at pH 6.0 using *t*BuNH<sub>2</sub>OH) was desalted using a  $\mu\text{C18}$  ZipTip® pipet tip. Modified and unmodified peptides were eluted in MeCN/ddH<sub>2</sub>O (60:40, 0.1% TFA). The desalted peptide mixture was then analyzed by MALDI-TOF/TOF MS/MS (CHCA matrix).

## Supporting Figures

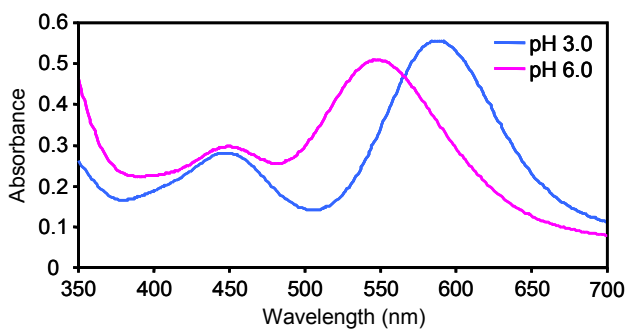

**Figure S1.** UV-vis spectrum of 1 mM Rh<sub>2</sub>(OAc)<sub>4</sub> in 80% water / 20% ethylene glycol in the presence of 75 mM H<sub>2</sub>NOH at pH 3.0 and pH 6.0.

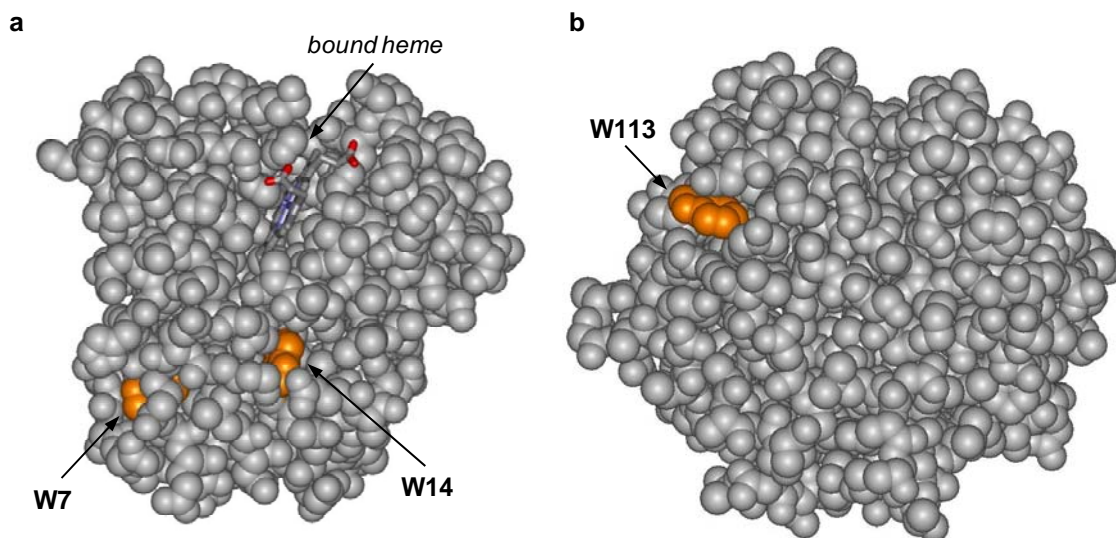

**Figure S2.** Space-filling models highlighting the positions of tryptophan residues (indole side chain shown in orange) in (a) horse heart myoglobin (PDB ID: 1WLA) and (b) subtilisin Carlsberg (PDB ID: 1SBC).

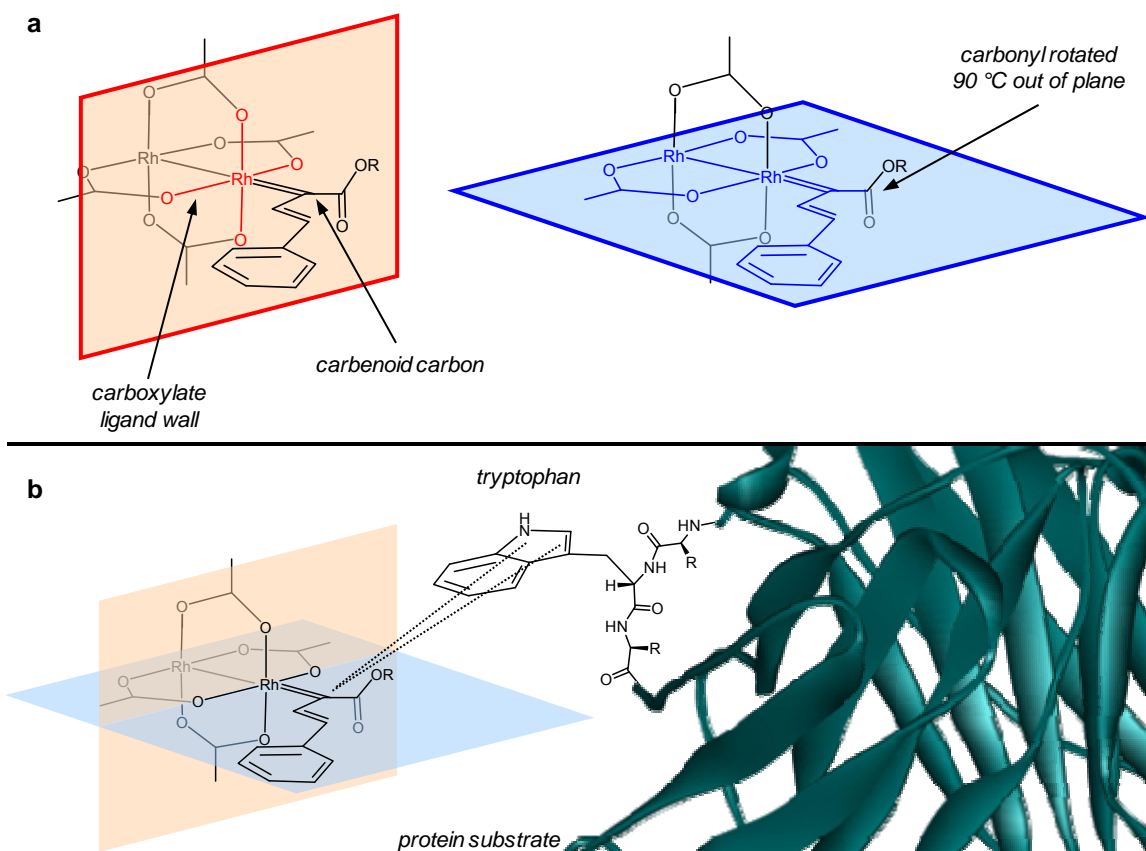

**Figure S3.** Steric considerations for tryptophan modification with rhodium carbenoid intermediates. (a) The carbenoid carbon lies in close proximity to the carboxylate ligands of the rhodium dimer and the ester functional group, resulting in a highly congested reactive center. (b) A high degree of solvent accessibility is required for tryptophan residues to approach the sterically congested carbenoid carbon successfully .

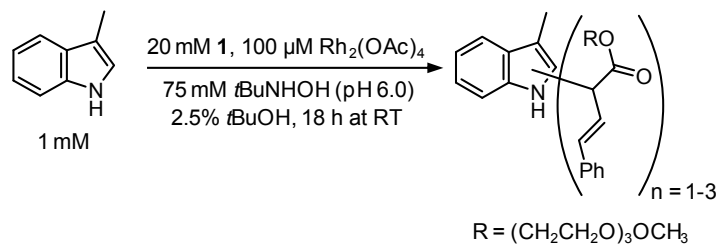

ESI-MS of Crude Reaction Mixture

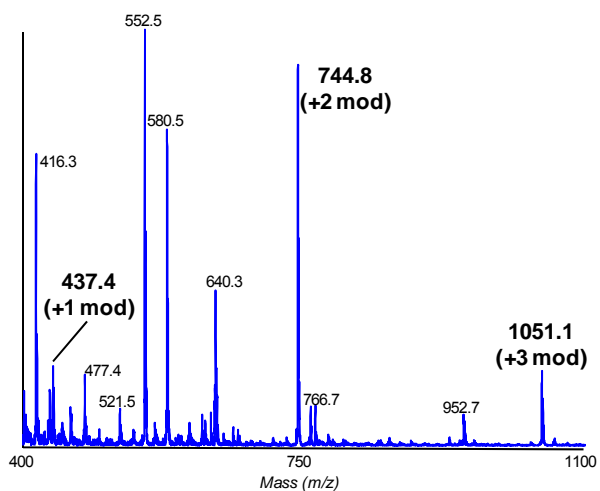

**Figure S4.** A 1 mM solution of 3-methylindole was treated with 20 mM **1** and 100  $\mu\text{M}$   $\text{Rh}_2(\text{OAc})_4$  in the presence of 75 mM *t*BuNHOH (pH 6.0), resulting in up to three modifications as indicated by ESI-MS. Calculated masses  $[\text{M}+\text{H}]^+$  for +1 mod = 438.2, +2 mod = 744.4, +3 mod = 1050.5.

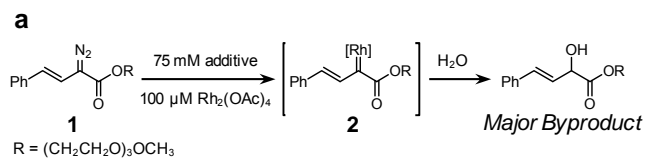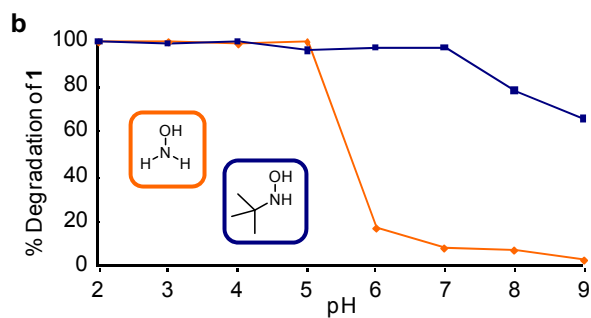

**Figure S5.** (a) Catalytic degradation of **1** by  $\text{Rh}_2(\text{OAc})_4$  in the presence of  $\text{H}_2\text{NOH}$  or  $t\text{BuNHOH}$ . (b) The consumption of **1** was determined by reversed-phase HPLC. Note: Reactions contain 2.5%  $t\text{BuOH}$  (v/v).

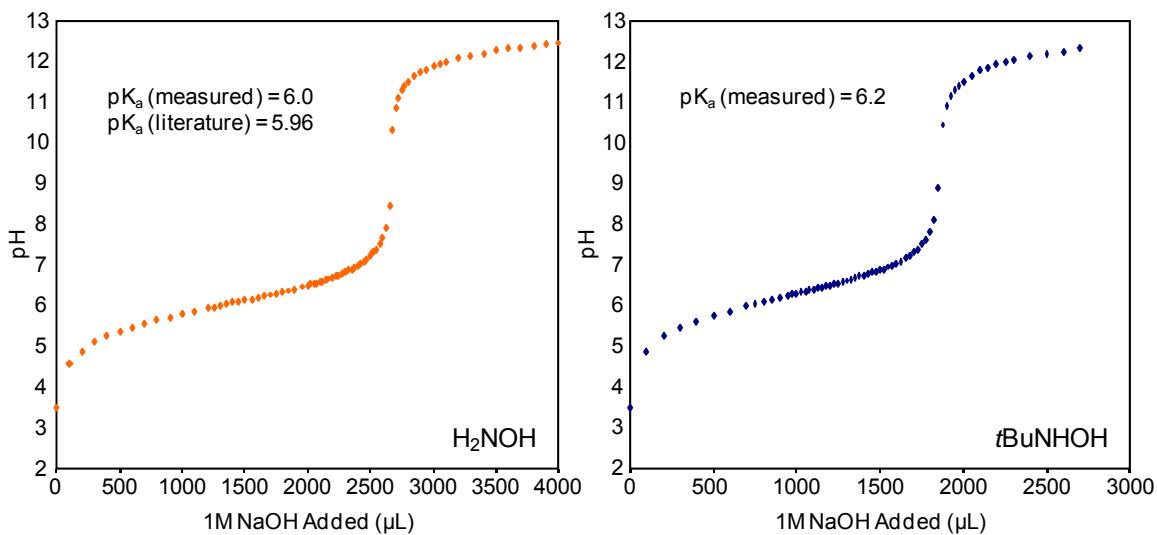

**Figure S6.** Titration curves for the determination of  $\text{pK}_a$  for  $\text{H}_2\text{NOH}$  and  $t\text{BuNHOH}$ .

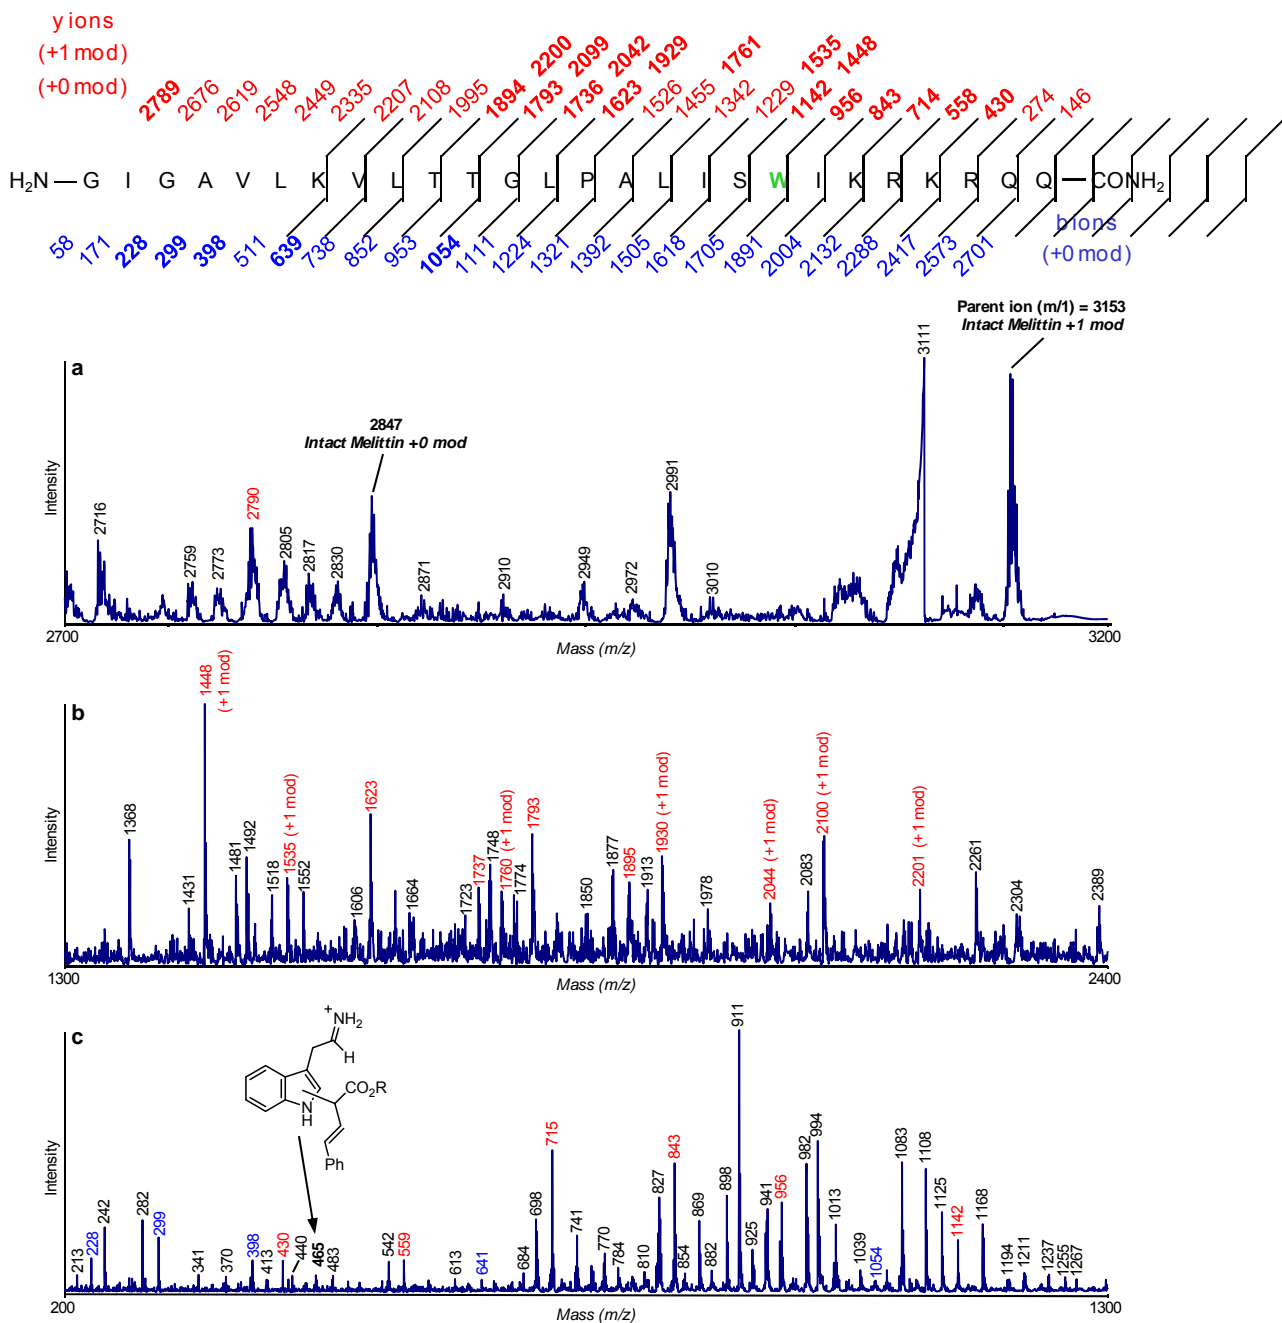

**Figure S7.** MALDI-TOF/TOF analysis of singly modified melittin. (a) Mass range  $m/z = 2700-3200$ . (b) Mass range  $m/z = 1300-2400$ . (c) Mass range  $m/z = 200-1300$ . Expected  $m/z = 465$  for the immonium ion.

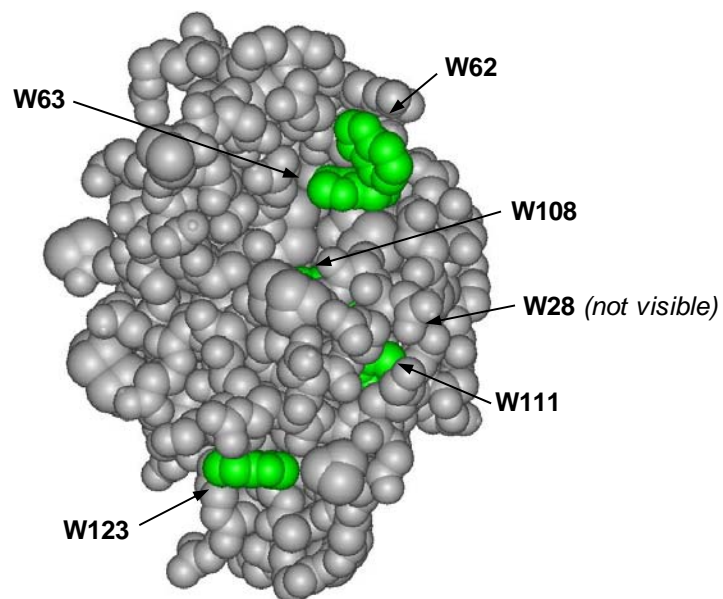

**Figure S8.** Space-filling model highlighting the positions of tryptophan residues (indole side chain shown in green) in hen egg white lysozyme (PDB ID: 2VB1). W28, W63, W108, and W111 are largely buried while W123 and W62 show a modest and significant degree of surface accessibility, respectively. The view of W28, W108, and W111 is obscured in most orientations of the space-filling model.



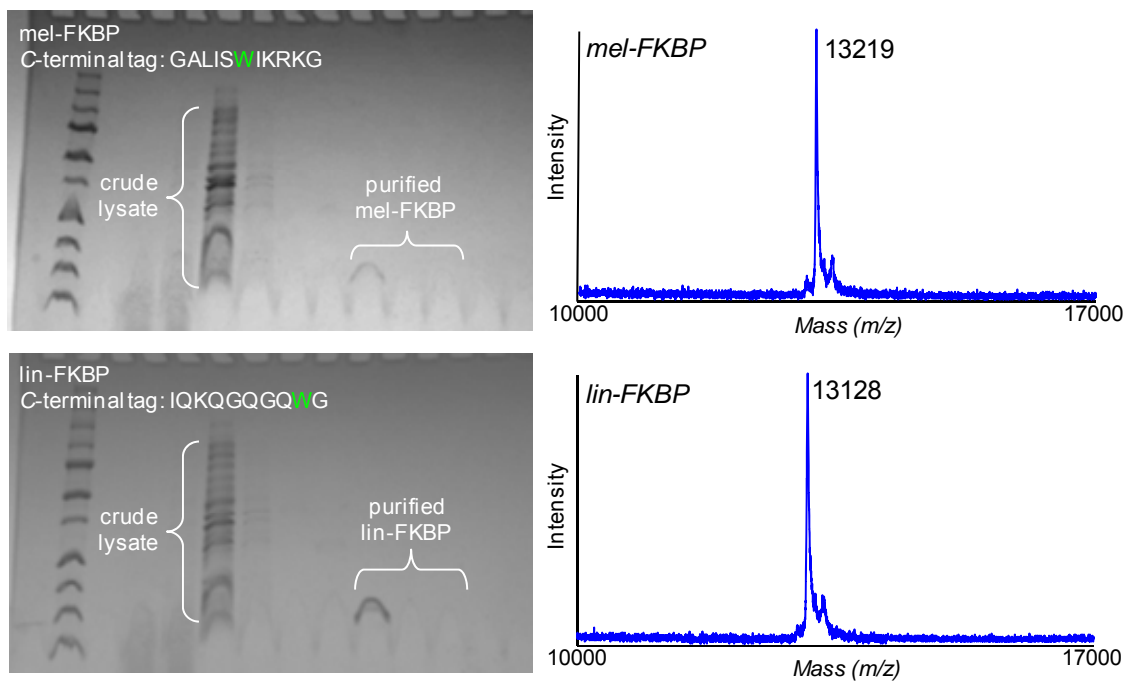

**Figure S9.** Two FKBP mutants were expressed with C-terminal peptide tags bearing tryptophan residues. The proteins were readily isolated by chitin affinity chromatography followed by intein cleavage. Protein purity was confirmed by SDS-PAGE. MALDI-TOF-MS (sinapinic acid matrix) revealed appropriate molecular weights for each mutant.
